# Supplementary material
Source: publisher site journal article supplement (https://www.dovepress.com/article/398108)
Supplement: Supplementary file 1 [file get_supplementary_file.php]

Supplementary Table 1. Comparison of baseline characteristic between two groups

| Dependent variables | Rehabilitation group | Control group | P-value |
| --- | --- | --- | --- |
| MIPmean  Median（IQR） | 39.18（30.88~49.66） | 39.56（32.09~44.25） | 0.621 |
| MIPmax  Median（IQR） | 52.34（44.84~63.63） | 49.39（42.46~56.39） | 0.560 |
| 6MWD  Mean（SD） | 564.80±75.04 | 580.72±74.02 | 0.454 |
| 1. ACT   Median（IQR） | 25.00（23.00~25.00） | 25.00（23.00~26.00） | 0.510 |
| FVC%  Mean（SD） | 90.71±12.09 | 95.46±14.65 | 0.217 |
| FEV1%  Mean（SD） | 84.56±9.83 | 91.48±9.32 | 0.372 |
| FEV1/FVC%  Mean（SD） | 93.10±6.20 | 92.04±7.97 | 0.602 |
| PEF%  Mean（SD） | 87.91±15.56 | 88.70±13.98 | 0.851 |
| MEF75%  Mean（SD） | 78.20±13.67 | 76.81±17.68 | 0.757 |
| MEF50%  Mean（SD） | 59.29±9.99 | 59.32±16.66 | 0.995 |
| MEF25%  Mean（SD） | 47.93±10.71 | 48.32±13.60 | 0.911 |
| MMEF75/25%  Mean（SD） | 56.44±10.18 | 57.11±15.83 | 0.861 |
| 3.0 Asthma module  Mean（SD） | 19.12±9.36 | 15.20±8.41 | 0.126 |
| Asthma  Median（IQR） | 7.00(6.00~8.50) | 5.00(4.00~8.50) | 0.065 |
| Treatment  Median（IQR） | 5.00(5.00~8.00) | 4.00(2.00~8.00) | 0.200 |
| Worry  Median（IQR） | 1.00(0.00~4.00) | 2.00(0.00~4.00) | 0.847 |
| Communication  Median（IQR） | 3.00(0.00~5.50) | 2.00(1.00~3.00) | 0.205 |
| 4.0 Generic core scales  Mean（SD） | 16.72±8.60 | 17.92±8.76 | 0.627 |
| Physical functioning  Median（IQR） | 7.00(4.00~8.50) | 7.00(4.50~8.00) | 0.769 |
| Emotional functioning  Median（IQR） | 3.00(1.00~5.50) | 2.00(0.00~6.00) | 0.595 |
| Social functioning  Median（IQR） | 1.00(0.00~4.00) | 2.00(0.00~5.00) | 0.519 |
| School functioning  Median（IQR） | 6.00(2.50~7.00) | 5.00(3.50~6.50) | 0.624 |

Note：MIP：maximum inspiratory pressure；6MWD：6 minutes walking distance；C-ACT：children-asthma control test；FVC：forced vital capacity；FEV1：forced expiratory volume in one second；FEV1/FVC：one-second rate；PEF：peak expiratory flow；MEF75：maximum expiratory flow at 75% of vital capacity；MEF50：maximum expiratory flow at 50% of vital capacity；MEF25：maximum expiratory flow at 25% of vital capacity；MMEF75/25：mid-forced expiratory flow rate

Simple size

The study used a sample size calculation formula for the comparison of the means of two samples：N1=N2=[(Zα/2+Zβ)σ/β]2(Q1-1+Q2-1),bring in the value of muscle strength in Elnaggar’s study and considering a 20% dropout rate. Finally, N1=N2=25.

The evalution of rehabilitation compliance and safety

The rehabilitation group should complete 4200 (25×14×4×3) times respiratory muscle training, and 3589 times were actually completed, with a completion rate of 85.45% (3589 / 4200). Adverse reactions (dizziness due to excessive speed) occurred in the training in 12 times (12 / 3589=0.33%), which was relieved after a short rest. The rehabilitation group should complete 900 (25×3×4×3) times exercise training, and 732 times were actually completed, with a completion rate of 81.33% (732 / 900). Adverse reactions (cough, wheezing, shortness of breath, dyspnea) occurred in 18 times (18 / 732=2.46%), all the adverse symptoms were mild, relieved after a short rest, and there was no acute asthma attack or hospitalization caused by exercise.
